# Supplementary material
Source: PubMed Central journal article supplement (PMC3798083)
Supplement: 113.069849_ajcn069849SupplementaryData1.pdf [file 113.069849_ajcn069849SupplementaryData1.pdf]

**Supplementary Table 1: Means and variances of daily physical activity traits and sedentary behavior in monozygotic and dizygotic twins**

| Trait                            | Mean $\pm$ SD     |                   | test of difference   |                       |                      |                       |
|----------------------------------|-------------------|-------------------|----------------------|-----------------------|----------------------|-----------------------|
|                                  | MZ-twins          | DZ-twins          | unadjusted           |                       | adjusted             |                       |
|                                  |                   |                   | $P_{\text{mean}}$    | $P_{\text{variance}}$ | $P_{\text{mean}}$    | $P_{\text{variance}}$ |
| PAEE (kJ/day) <sup>1</sup>       | 2592 $\pm$ 968.1  | 2484 $\pm$ 950.1  | 1.3x10 <sup>-2</sup> | 0.79                  | 4.1x10 <sup>-2</sup> | 0.58                  |
| Acceleration (m/s <sup>2</sup> ) | 0.113 $\pm$ 0.050 | 0.105 $\pm$ 0.044 | 2.8x10 <sup>-4</sup> | 1.6x10 <sup>-4</sup>  | 1.1x10 <sup>-2</sup> | 7.9x10 <sup>-6</sup>  |
| MVPA (min/d) <sup>1</sup>        | 44 $\pm$ 35       | 39 $\pm$ 33       | 2.6x10 <sup>-3</sup> | 0.76                  | 0.06                 | 0.50                  |
| Sedentary (min/d)                | 1039 $\pm$ 126.6  | 1055 $\pm$ 128.8  | 8.1x10 <sup>-3</sup> | 0.65                  | 0.14                 | 0.98                  |

PAEE, physical activity energy expenditure; Acceleration, average longitudinal acceleration of the trunk; MVPA and Sedentary, time spent in moderate-to-vigorous intensity physical activity (>3 METs) and sedentary behavior ( $\leq$ 1.5 METs).

Results are based on data from 899 monozygotic (MZ) and 755 dizygotic (DZ) twins; <sup>1</sup> Traits were analyzed after inverse-normal transformation. Differences were calculated using Student's t-tests, either directly (unadjusted) or on residuals after adjusting for sex, age, BMI, ethnicity and seasonality (adjusted).

**Supplementary Table 2: Actiheart wear time in monozygotic and dizygotic twin pairs**

| n days data | Absolute sample size (n) |     |          |            | Relative frequency (%) |
|-------------|--------------------------|-----|----------|------------|------------------------|
|             | MZ                       | DZ  | Combined | Cumulative | Cumulative inverse     |
| ≥ 7 days    | 486                      | 415 | 901      | 901        | 54.5                   |
| 6 days      | 291                      | 249 | 540      | 1,441      | 87.1                   |
| 5 days      | 54                       | 31  | 85       | 1,526      | 92.3                   |
| 4 days      | 26                       | 29  | 55       | 1,581      | 95.6                   |
| 3 days      | 20                       | 11  | 31       | 1,612      | 97.5                   |
| 2 days      | 11                       | 10  | 21       | 1,633      | 98.7                   |
| 1 day       | 11                       | 10  | 21       | 1,654      | 100.0                  |

Numbers were rounded down to the nearest integer for monozygotic (MZ) and dizygotic (DZ) twins.

**Supplementary Table 3: The influence of adjusting for body mass index on variance component estimates**

| Trait                                                 | Variance components |              |       |              |       |              | Model fit    |          |       |          |
|-------------------------------------------------------|---------------------|--------------|-------|--------------|-------|--------------|--------------|----------|-------|----------|
|                                                       | A                   | 95% CI A     | C     | 95% CI C     | E     | 95% CI E     | $\Delta h^2$ | -2IL     | df    | AIC      |
| <b>Adjusted for sex, age, age<sup>2</sup> and BMI</b> |                     |              |       |              |       |              |              |          |       |          |
| PAEE <sup>1</sup>                                     | 0.465               | 0.234, 0.534 | 0.015 | 0.000, 0.211 | 0.521 | 0.459, 0.595 | -            | 4,265.6  | 1650  | 965.6    |
| Acceleration                                          | 0.352               | 0.000, 0.442 | 0.016 | 0.000, 0.320 | 0.632 | 0.554, 0.716 | -            | -5,675.9 | 1650  | -8,975.9 |
| MVPA <sup>1</sup>                                     | 0.474               | 0.289, 0.538 | 0.000 | 0.000, 0.166 | 0.526 | 0.460, 0.603 | -            | 4,280.3  | 1648  | 984.3    |
| Sedentary                                             | 0.310               | 0.094, 0.505 | 0.145 | 0.000, 0.321 | 0.545 | 0.478, 0.618 | -            | 20,389.2 | 1648  | 17,093.2 |
| <b>Adjusted for sex, age and age<sup>2</sup></b>      |                     |              |       |              |       |              |              |          |       |          |
| PAEE <sup>1</sup>                                     | 0.504               | 0.292, 0.558 | 0.000 | 0.000, 0.183 | 0.496 | 0.439, 0.565 | 0.039        | 4,343.3  | 1,650 | 1,043.3  |
| Acceleration                                          | 0.328               | 0.000, 0.461 | 0.056 | 0.000, 0.339 | 0.616 | 0.533, 0.701 | -0.024       | -5,602.4 | 1,650 | -8,902.4 |
| MVPA <sup>1</sup>                                     | 0.491               | 0.287, 0.556 | 0.000 | 0.000, 0.176 | 0.509 | 0.441, 0.589 | 0.017        | 4,352.5  | 1,648 | 1,056.5  |
| Sedentary                                             | 0.301               | 0.085, 0.503 | 0.151 | 0.000, 0.329 | 0.548 | 0.478, 0.624 | -0.009       | 20,438.0 | 1,648 | 17,142.0 |

A, C and E, the variance explained by additive genetic, shared/common environmental and unique environmental factors with their 95% confidence intervals as acquired by structural equation modeling. PAEE, physical activity energy expenditure (kJ/d); Acceleration, average acceleration of the trunk along the vertical axis of the body ( $m/s^2$ ); MVPA and Sedentary, time spent in moderate-to-vigorous intensity physical activity ( $>3$  METs) and sedentary behavior ( $\leq 1.5$  METs) (min/day);  $\Delta h^2$ , heritability estimate (A) compared with the model that adjusts for body size; -2IL, -2 log-likelihood; df, degrees of freedom; AIC, Akaike's information criterion. <sup>1</sup> Traits were analyzed after inverse-normal transformation.

**Supplementary Table 4: The influence of including pairs with sub-optimal data quality or of male sex on variance component estimates**

| Trait                                                                                                                                                     | Variance components |              |       |              |       |              | $\Delta h^2$ | -2IL     | Model fit df | AIC       |
|-----------------------------------------------------------------------------------------------------------------------------------------------------------|---------------------|--------------|-------|--------------|-------|--------------|--------------|----------|--------------|-----------|
|                                                                                                                                                           | A                   | 95% CI A     | C     | 95% CI C     | E     | 95% CI E     |              |          |              |           |
| <b>No exclusions</b>                                                                                                                                      |                     |              |       |              |       |              |              |          |              |           |
| PAEE <sup>1</sup>                                                                                                                                         | 0.465               | 0.234, 0.534 | 0.015 | 0.000, 0.211 | 0.521 | 0.459, 0.595 | -            | 4,265.6  | 1,650        | 965.6     |
| Acceleration                                                                                                                                              | 0.352               | 0.000, 0.442 | 0.016 | 0.000, 0.320 | 0.632 | 0.554, 0.716 | -            | -5,675.9 | 1,650        | -8,975.9  |
| MVPA <sup>1</sup>                                                                                                                                         | 0.474               | 0.289, 0.538 | 0.000 | 0.000, 0.166 | 0.526 | 0.460, 0.603 | -            | 4,280.3  | 1,648        | 984.3     |
| Sedentary                                                                                                                                                 | 0.310               | 0.094, 0.505 | 0.145 | 0.000, 0.321 | 0.545 | 0.478, 0.618 | -            | 20,389.2 | 1,648        | 17,093.2  |
| <b>73 twins with less than four days of data excluded; data from 1,581 twins of 714 complete twin pairs analyzed</b>                                      |                     |              |       |              |       |              |              |          |              |           |
| PAEE <sup>1</sup>                                                                                                                                         | 0.487               | 0.252, 0.544 | 0.000 | 0.000, 0.200 | 0.512 | 0.450, 0.591 | 0.022        | 4,074.2  | 1,577        | 920.2     |
| Acceleration                                                                                                                                              | 0.292               | 0.000, 0.451 | 0.081 | 0.000, 0.363 | 0.626 | 0.536, 0.710 | -0.060       | -5,417.2 | 1,577        | -8,571.2  |
| MVPA <sup>1</sup>                                                                                                                                         | 0.463               | 0.225, 0.528 | 0.000 | 0.000, 0.204 | 0.537 | 0.467, 0.621 | -0.011       | 4,080.8  | 1,575        | 930.8     |
| Sedentary                                                                                                                                                 | 0.339               | 0.121, 0.515 | 0.126 | 0.000, 0.308 | 0.535 | 0.467, 0.611 | 0.029        | 19,476.8 | 1,575        | 16,326.8  |
| <b>174 twin pairs in whom PA assessment did not start on the same day in both co-twins excluded; data from 1,306 twins of 598 complete pairs analyzed</b> |                     |              |       |              |       |              |              |          |              |           |
| PAEE <sup>1</sup>                                                                                                                                         | 0.462               | 0.196, 0.545 | 0.021 | 0.000, 0.250 | 0.517 | 0.447, 0.602 | -0.003       | 3,360.6  | 1,302        | 756.6     |
| Acceleration                                                                                                                                              | 0.290               | 0.000, 0.469 | 0.084 | 0.000, 0.374 | 0.626 | 0.522, 0.725 | -0.062       | -4,499.8 | 1,302        | -7,103.8  |
| MVPA <sup>1</sup>                                                                                                                                         | 0.402               | 0.107, 0.536 | 0.077 | 0.000, 0.344 | 0.521 | 0.448, 0.607 | -0.072       | 2,274.5  | 1,301        | 772.5     |
| Sedentary                                                                                                                                                 | 0.307               | 0.057, 0.515 | 0.148 | 0.000, 0.351 | 0.545 | 0.466, 0.630 | -0.003       | 16,098.1 | 1,301        | 13,496.1  |
| <b>125 twin pairs in whom PA assessment did not start within 7 days in both co-twins excluded; data from 1,404 twins of 647 complete pairs analyzed</b>   |                     |              |       |              |       |              |              |          |              |           |
| PAEE <sup>1</sup>                                                                                                                                         | 0.439               | 0.189, 0.539 | 0.043 | 0.000, 0.255 | 0.518 | 0.451, 0.600 | -0.026       | 3,609.2  | 1,400        | 809.2     |
| Acceleration                                                                                                                                              | 0.362               | 0.000, 0.450 | 0.003 | 0.000, 0.330 | 0.635 | 0.545, 0.730 | 0.010        | -4,812.2 | 1,400        | -7,612.2  |
| MVPA <sup>1</sup>                                                                                                                                         | 0.472               | 0.186, 0.544 | 0.011 | 0.000, 0.267 | 0.516 | 0.447, 0.599 | -0.002       | 3,625.7  | 1,399        | 827.7     |
| Sedentary                                                                                                                                                 | 0.270               | 0.039, 0.493 | 0.180 | 0.000, 0.371 | 0.550 | 0.477, 0.629 | -0.040       | 17,308.7 | 1,399        | 14,510.69 |
| <b>435 twins with self-reported zygosity excluded; data from 1,219 twins of 571 complete pairs analyzed</b>                                               |                     |              |       |              |       |              |              |          |              |           |
| PAEE <sup>1</sup>                                                                                                                                         | 0.500               | 0.281, 0.570 | 0.000 | 0.000, 0.179 | 0.500 | 0.426, 0.590 | 0.035        | 3,143.0  | 1,215        | 713.0     |
| Acceleration                                                                                                                                              | 0.296               | 0.000, 0.442 | 0.045 | 0.000, 0.326 | 0.659 | 0.554, 0.763 | -0.056       | -4,163.7 | 1,215        | -6,593.7  |
| MVPA <sup>1</sup>                                                                                                                                         | 0.437               | 0.253, 0.516 | 0.000 | 0.000, 0.153 | 0.563 | 0.480, 0.664 | -0.037       | 3,146.8  | 1,213        | 720.8     |
| Sedentary                                                                                                                                                 | 0.404               | 0.160, 0.560 | 0.091 | 0.000, 0.279 | 0.505 | 0.424, 0.597 | 0.094        | 15,016.5 | 1,213        | 12,590.5  |
| <b>79 twins with self-reported disability excluded; data from 1,575 twins of 704 complete pairs analyzed</b>                                              |                     |              |       |              |       |              |              |          |              |           |
| PAEE <sup>1</sup>                                                                                                                                         | 0.470               | 0.224, 0.535 | 0.007 | 0.000, 0.215 | 0.523 | 0.458, 0.601 | 0.005        | 4,035.0  | 1,571        | 893.0     |
| Acceleration                                                                                                                                              | 0.375               | 0.008, 0.456 | 0.000 | 0.000, 0.315 | 0.625 | 0.541, 0.713 | 0.023        | -5,398.3 | 1,571        | -8,540.3  |
| MVPA <sup>1</sup>                                                                                                                                         | 0.468               | 0.265, 0.537 | 0.000 | 0.000, 0.176 | 0.532 | 0.460, 0.612 | -0.006       | 4,075.9  | 1,570        | 935.9     |
| Sedentary                                                                                                                                                 | 0.317               | 0.083, 0.505 | 0.129 | 0.000, 0.322 | 0.554 | 0.483, 0.632 | 0.007        | 19,416.9 | 1,570        | 16,276.9  |
| <b>35 male twins excluded; data from 1,619 twins of 757 complete pairs analyzed</b>                                                                       |                     |              |       |              |       |              |              |          |              |           |
| PAEE <sup>1</sup>                                                                                                                                         | 0.485               | 0.248, 0.540 | 0.000 | 0.000, 0.200 | 0.515 | 0.454, 0.592 | 0.020        | 4,159.6  | 1,615        | 929.6     |
| Acceleration                                                                                                                                              | 0.350               | 0.000, 0.439 | 0.012 | 0.000, 0.312 | 0.638 | 0.558, 0.726 | -0.002       | -5,566.4 | 1,615        | -8,796.4  |
| MVPA <sup>1</sup>                                                                                                                                         | 0.476               | 0.304, 0.543 | 0.000 | 0.000, 0.151 | 0.524 | 0.455, 0.600 | 0.002        | 4,175.4  | 1,613        | 949.4     |
| Sedentary                                                                                                                                                 | 0.307               | 0.093, 0.505 | 0.146 | 0.000, 0.322 | 0.547 | 0.479, 0.620 | -0.003       | 19,958.2 | 1,613        | 16,732.2  |

A, C and E, the variance explained by additive genetic, shared/common environmental and unique environmental factors with their 95% confidence intervals as acquired by structural equation modeling. All models are adjusted for sex, age, age<sup>2</sup>, BMI and sex (except for analyses in women only); PAEE, physical activity energy expenditure (kJ/d); Acceleration, average acceleration of the trunk along the vertical axis of the body (m/s<sup>2</sup>); MVPA and Sedentary, time spent in moderate-to-vigorous intensity physical activity (>3 METs) and sedentary behavior (≤1.5 METs) (min/day);  $\Delta h^2$ , heritability estimate (A) when compared with the model with no exclusions; -2IL, -2 log-likelihood; df, degrees of freedom; AIC, Akaike's information criterion. <sup>1</sup> Traits were analyzed after inverse-normal transformation.
